1 **Can malaria parasites manipulate the odour-mediated host preference of their mosquito**  
2 **vectors?**

3

4 Phuong L. Nguyen<sup>a,\*</sup>,<sup>1</sup>, Amélie Vantaux<sup>a,b,\*</sup>,<sup>2</sup> Domonbabele FdS Hien<sup>b</sup>, Kounbo R.  
5 Dabiré<sup>b,c</sup>, Bienvenue K. Yameogo<sup>b</sup>, Louis-Clément Gouagna<sup>a</sup>, Didier Fontenille<sup>a,d</sup>, François  
6 Renaud<sup>a</sup>, Frédéric Simard<sup>a</sup>, Carlo Costantini<sup>a</sup>, Frédéric Thomas<sup>a</sup>, Anna Cohuet<sup>a</sup>, Thierry  
7 Lefèvre<sup>a,b,c</sup>

8

9 <sup>a</sup> MIVEGEC (Maladies Infectieuses et Vecteurs: Ecologie, Génétique, Evolution et Contrôle),  
10 UMR IRD 224-CNRS 5290-UM, Montpellier, France.

11 <sup>b</sup> Institut de Recherche en Sciences de la Santé (IRSS), Bobo-Dioulasso, Burkina Faso.

12 <sup>c</sup> Laboratoire mixte international sur les vecteurs (LAMIVECT), Bobo Dioulasso, Burkina  
13 Faso.

14 <sup>d</sup> Institut Pasteur du Cambodge, Phnom Penh, Cambodia

15

16 **Corresponding author:** AV: [amelie.vantaux@gmail.com](mailto:amelie.vantaux@gmail.com)

17

18 \* These authors equally contributed

19 <sup>1</sup> Present address: Institut de Biologie, École Normale Supérieure, 46 rue d'Ulm, 75012, Paris,  
20 France

21 <sup>2</sup> Present address: Malaria Molecular Epidemiology Unit, Institut Pasteur of Cambodia, 5 Bd  
22 Monivong, PO Box 983, Phnom Penh 12 201, Cambodia

23

24

25

26 **Abstract**

27 Malaria parasites can manipulate mosquito feeding behaviours such as motivation and avidity  
28 to feed on vertebrate hosts in ways that increase parasite transmission. However, in natural  
29 conditions, not all vertebrate blood-sources are suitable hosts for the parasite. Whether  
30 malaria parasites can manipulate mosquito host choice in ways that enhance parasite  
31 transmission toward suitable hosts and/or reduce mosquito attraction to unsuitable hosts (i.e.  
32 specific manipulation) is unknown. To address this question, we experimentally infected three  
33 species of mosquito vectors (*Anopheles coluzzii*, *Anopheles gambiae*, and *Anopheles*  
34 *arabiensis*) with wild isolates of the human malaria parasite *Plasmodium falciparum*, and  
35 examined the effects of immature (oocyst) and mature (sporozoite) infections on mosquito  
36 behavioural responses (activation rate and odour choice) to combinations of calf odour,  
37 human odour and outdoor air using a dual-port olfactometer. Regardless of parasite  
38 developmental stage and mosquito species, *P. falciparum* infection did not alter mosquito  
39 activation rate or their choice for human odours. The overall expression pattern of host choice  
40 of all three mosquito species was consistent with a high degree of anthropophily, with both  
41 infected and uninfected individuals showing higher attraction toward human odour over calf  
42 odour, human odour over outdoor air, and outdoor air over calf odour. Our results suggests  
43 that, in this system, the parasite may not be able to manipulate the early long-range  
44 behavioural steps involved in the mosquito host-feeding process, including initiation of host-  
45 seeking and host orientation. Future studies examining mosquito host-feeding behaviours at a  
46 shorter range (i.e. the “at-host” foraging activities) are required to test whether malaria  
47 parasites can modify their mosquito host choice to enhance transmission toward suitable hosts  
48 and/or reduce biting on unsuitable hosts.

49

50 **Keywords:** *Anopheles*, experimental infection, host manipulation by parasites, host-seeking

51 behaviours, olfactometer, *Plasmodium*.

52

53

## 54 **1. Introduction**

55 Host behavioural manipulation by parasites is a widespread transmission strategy (Moore,  
56 2002; Lefèvre et al., 2009a; Poulin, 2010; Hughes et al. 2012). Trophically-transmitted  
57 parasites, for example, can alter the behaviour of their intermediate hosts in ways that increase  
58 predation rate by definitive hosts, hence favouring transmission (Lafferty and Morris, 1996;  
59 Lagrue et al., 2007; Lagrue et al., 2013). However, altering the behaviour of intermediate  
60 hosts can also increase predation rates by unsuitable hosts (Mouritsen and Poulin, 2003;  
61 Kaldonski et al., 2008; Seppälä et al., 2008). This higher probability of being killed by dead-  
62 end predators can incur significant costs to manipulative parasites, especially when initial  
63 predation risk is high (Seppälä and Jokela, 2008). In response, some parasites have evolved  
64 specific manipulation, i.e. the ability to enhance transmission toward appropriate hosts and/or  
65 reduce predation by unsuitable hosts (Lagrue et al., 2007; Médoc and Beisel, 2009; Médoc et  
66 al., 2009; Seppälä et al., 2012; Lagrue et al., 2013; Jacquin et al., 2014).

67 In addition to its ecological and evolutionary relevance, host manipulation may also  
68 have profound implications for human health. Many manipulative parasites are responsible  
69 for devastating vector-borne diseases such as dengue fever, malaria, leishmaniasis, or sleeping  
70 sickness. Vector-borne parasites can indeed manipulate phenotypic traits of their vectors and  
71 hosts in ways that increase contacts between them, hence favouring parasite transmission  
72 (Hurd, 2003; Lacroix et al., 2005; Lefèvre and Thomas, 2008; Cator et al., 2012; Cornet et al.,  
73 2013a; De Moraes et al., 2014; Caljon et al., 2016). A frequently reported change induced by  
74 vector-borne parasites is alteration of vector motivation and avidity to feed. For example in  
75 malaria mosquitoes, individuals infected with *Plasmodium* sporozoites (the mosquito to  
76 human transmission stages) can display increased response to host odours (Rossignol et al.,  
77 1986; Cator et al., 2013), increased landing and biting activity (Rossignol et al., 1984, 1986;

78 Wekesa et al. 1992; Anderson et al. 1999; Koella et al., 2002; Smallegange et al., 2013;),  
79 increased number of feeds (Koella et al., 1998) and increased blood volume intake (Koella  
80 and Packer, 1996; Koella et al., 1998; Koella et al. 2002). In contrast, mosquitoes infected  
81 with oocysts (the immature non-transmissible stage of the parasite), are less persistent and  
82 less likely to attempt to feed (Anderson et al., 1999; Koella et al., 2002; Cator et al., 2013).  
83 Since biting is risky (e.g., host defensive behaviours can kill the vector and its parasite),  
84 reduced feeding attempts seems beneficial to the parasite (Schwartz and Koella, 2001).

85 In natural conditions, these “stage-dependent” behavioural changes presumably  
86 increase the rate at which a mosquito will feed on a vertebrate blood-source, not all of which  
87 are suitable hosts for the parasite. The very few epidemiological models that have considered  
88 mosquito behavioural manipulation by malaria parasites have assumed that suitable hosts for  
89 parasite development were the only source of blood (Dobson, 1988; Cator et al., 2014). These  
90 models have ignored the possibility that malaria parasites may increase biting rate on  
91 vertebrates that do not act as suitable hosts. Similarly, no study has, to our knowledge,  
92 investigated whether malaria parasites can manipulate mosquito vertebrate choice in ways that  
93 enhance parasite transmission toward suitable hosts and/or reduce mosquito attraction to  
94 unsuitable hosts (i.e. specific manipulation).

95 Mosquito choice for vertebrate blood-source is an important key predictor for the  
96 transmission intensity of vector-borne diseases. This choice may be influenced by genetic and  
97 environmental factors such as the innate preference of the mosquito and the availability of the  
98 vertebrate species (Lyimo and Ferguson, 2009). While some malaria vectors can display  
99 propensity to feed on different vertebrate species (i.e. generalist or opportunistic feeding  
100 behaviour) (Takken and Verhulst, 2013), the parasites they transmit are often highly host-  
101 specific, infecting only one or a few vertebrate species (Perkins, 2014). Because of this strong  
102 host specificity, it is possible that vector-borne parasites acquired, during the course of

103 evolution, the ability to target appropriate host and/or avoid unsuitable ones (Lefèvre et al.,  
104 2006). Accordingly, generalist mosquitoes, once infected, should develop a feeding  
105 preference for vertebrates that are suitable for parasite development. Studies exploring this  
106 possibility may yield important information about the diversity of transmission strategies used  
107 by malaria parasites and show that mosquitoes infected with transmissible parasite stages not  
108 only bite “more” but perhaps also “better”.

109       Theoretically, there are several ways through which malaria parasites could maximise  
110 transmission towards suitable vertebrate hosts. First, the parasite may induce in the mosquito  
111 vector a sensory bias for host traits (e.g. specific odours) that are correlated with optimal  
112 suitability for the parasite. Second, the parasite may induce alteration of mosquito  
113 microhabitat choice, in a way that spatially matches the microhabitat of the suitable host  
114 species. Finally, the parasite may induce changes in time activity in a way that temporally  
115 matches the resting time of the suitable host.

116       Here, we explored the first possibility using the natural association between  
117 *Plasmodium falciparum*, which causes the most severe form of human malaria, the mosquito  
118 species *Anopheles coluzzii*, *Anopheles gambiae* and *Anopheles arabiensis*, three major vectors  
119 of *P. falciparum* in Africa, and calves and human, two common mosquito vertebrate hosts. *An.*  
120 *coluzzii* and *An. gambiae* are considered anthropophilic (they are attracted to human stimuli)  
121 throughout its distribution, whereas *An. arabiensis* can display a weak host tropism  
122 (plastic/opportunistic) and can display either anthropophilic or zoophilic preference  
123 depending on the geographic area and the relative abundance of cattle and human (Costantini  
124 et al., 1999; Takken and Verhulst, 2013). *P. falciparum* displays an extreme form of  
125 specificity and can develop and reproduce in hominids only (predominantly in human and to a  
126 lesser extent in chimpanzee, bonobo, and gorilla) (Prugnolle et al., 2011; Rayner et al., 2011;  
127 Ngoubangoye et al., 2016), such that any mosquito bite on another vertebrate species, such as

128 cattle, would be a dead-end for the parasite. We experimentally challenged local colonies of  
129 three mosquito species with sympatric field isolates of *P. falciparum* using direct membrane  
130 feeding assays in Burkina Faso, and examined the effects of immature (oocyst) and mature  
131 (sporozoite) infections on mosquito choice between human and calf odours using a dual-port  
132 olfactometer.

## 133 **2. Material and methods**

### 134 **2.1. Mosquitoes**

135 *Anopheles gambiae* and *An. coluzzii* mosquitoes originated from outbred colonies established  
136 in 2008 and repeatedly replenished with F1 from wild-caught mosquito females collected in  
137 Soumouso (*An. gambiae*) (11°01'00"N, 4°02'59"W) and Kou Valley (*An. coluzzii*)  
138 (11°23'14"N, 4°24'42"W), south-western Burkina Faso (West Africa) and identified by PCR-  
139 RFLP (Fanello et al., 2002; Santolamazza et al., 2008). Mosquitoes were maintained under  
140 standard insectary conditions ( $27 \pm 2^\circ\text{C}$ ,  $70 \pm 10\%$  relative humidity, 12:12 LD). Larvae were  
141 bred in the laboratory with *ad libitum* Tetramin<sup>®</sup> and adult mosquitoes were provided with a  
142 solution of 5% glucose.

143 *Anopheles arabiensis* mosquitoes originated from wild caught larvae in Dioulassoba  
144 (11°10'42"N, 4°18'26"W), a district of Bobo Dioulasso, where previous surveys ensured that  
145 *An. arabiensis* population was dominant (Dabiré et al., 2012, 2014). Collection of field larvae  
146 was conducted three times (twice in October 2014 and once in November 2014). Larvae were  
147 reared under the same standard insectary conditions as the mosquito colonies and F0 females  
148 were used for the experiments. Species identification of 35 individual from each wild caught  
149 batch (a total of 105 mosquitoes) was performed to confirm that *An. arabiensis* was the  
150 dominant species (Fanello et al., 2002). Samples from the 1<sup>st</sup> and 2<sup>nd</sup> batches in October

151 contained 60% and 90.91% of *An. arabiensis* respectively; sample from the 3<sup>rd</sup> batch in  
152 November contained 100% *An. arabiensis*.

## 153 **2.2. Experimental infections**

154 Experimental infections of mosquitoes were performed by membrane feeding of infectious  
155 blood (DMFA for Direct Membrane feeding Assay) as described previously (Ouédraogo et al.,  
156 2013; Vantaux et al., 2014; Vantaux et al., 2015; Roux et al., 2015; Hien et al., 2016). Briefly,  
157 three- to five-days old females were fed through membranes on *P. falciparum* gametocyte  
158 (the human to mosquito transmission stage) -infected blood from malaria patients in Burkina  
159 Faso. Mosquitoes were starved of glucose solution for 12 h (*An. gambiae* and *An. arabiensis*)  
160 or 24 h (*An. coluzzii*) prior to the infection. Gametocyte carriers were selected by examining  
161 thick blood smears from children aged between 5 and 11 from two villages in southwestern  
162 Burkina Faso (Dande and Soumouso, located 60km north and 40km southeast of Bobo  
163 Dioulasso, respectively) and blood drawing was carried out at laboratory. For *An. gambiae*  
164 and *An. arabiensis* mosquitoes, when gametocytemia was below 160 gametocytes/ $\mu$ l, blood  
165 serum was replaced with European naive AB serum to limit potential effect of human  
166 transmission blocking immunity and hence maximize the number of successfully infected  
167 mosquitoes (Gouagna et al., 2004). Serum was not changed in *An. coluzzii* experiments. As a  
168 negative control (uninfected mosquitoes), females were fed on the same blood in which  
169 gametocytes were heat-inactivated. Parasite inactivation was performed by placing the  
170 infectious blood in a thermo-mixer and heating at 43°C for 15 min and 900 rpm. This heat-  
171 inactivation prevents from infectiousness of gametocytes and does not affect the blood  
172 nutritive quality (Sangare et al., 2013). Mosquitoes exposed/unexposed to infection were  
173 therefore fed with blood from the same individual, avoiding the potential confounding effects  
174 of different blood origins on mosquito behaviours. Mosquito blood feeding was performed by



175 distributing three hundred  $\mu$ l of blood in membrane feeders maintained at 37°C by water  
176 jackets; cups containing 60-80 mosquitoes were placed under the feeders to allow blood  
177 engorgement through Parafilm<sup>®</sup> membranes for 2 hours. Fully blood-fed females were sorted  
178 out and placed in new cages (30x30x30 cm) where they had constant access to 5% glucose  
179 solution on cotton wool pads until the behavioural assays. A total of eight experimental  
180 replicates using 9 different gametocyte carriers were performed (see Table A1 for details).

### 181 **2.3. Behavioural assays**

182 A dual-choice olfactometer was used to study odour-mediated host choice by infected and  
183 uninfected mosquitoes (Lefèvre et al., 2009b; Lefèvre et al. 2010; Vantaux et al., 2015). *An.*  
184 *coluzzii* behavioural assays were carried out as in Vantaux et al. (2015). There was one slight  
185 modification in the set-up when used for *An. gambiae* and *An. arabiensis* assays for which the  
186 two tents were placed next to each other (Figure 1a). The olfactometer consisted of a source  
187 of two odours connected to two collecting boxes (30 x 30 x 40cm) linked by two glass tubes  
188 (L = 52cm,  $\square$  = 10cm) to a downwind box (L x l x h=60 x 40 x 40cm) (Figure 1a). Odour  
189 stimuli (from human, calf or outdoor air) came from two tents connected to the two collecting  
190 boxes of the olfactometer by air vent hoses (Scanpart<sup>®</sup>, D x L = 10 x 300 cm). Gauze was  
191 placed at the junction between the air vent hose and the collecting boxes to prevent  
192 mosquitoes entering the tent. A fan was set up at the junction of the air vent hose and the tent  
193 to draw air from the tent to the collecting box and the downwind box. The wind speed in the  
194 two downwind arms was regulated at 15cm/s ( $\pm$ 2cm/s) using a 435-4 Testo multi-functional  
195 meter (Testor, Forbach, France) equipped with a hot wire probe (range: 0 to 20m/s, accuracy:  
196  $\pm$  (0.03m/s +5% of mv)). The two tents were left outdoor while the collecting boxes and the  
197 downwind box were located inside an experimental room (Figure 1a).

198 Mosquitoes were coloured with either red or yellow powders (Luminous Powder Kit,  
199 BioQuip) corresponding to their exposure status (received either an infectious blood-meal or a  
200 heat-inactivated uninfected blood-meal) (Verhulst et al., 2013; Vantaux et al., 2015). The  
201 matching between exposure status and colours was switched between each run within a test  
202 day (Figure 1b). To increase mosquito response to host odours in the olfactometer set-up, the  
203 three mosquito species were deprived from glucose solution for 10 hours prior to the  
204 behavioural tests. During this period, mosquitoes had access to water only. For *An. gambiae*  
205 and *An. arabiensis* assays, in a single test day, a maximum of 6 runs each lasting 30 minutes  
206 were conducted using one mosquito species, and a total of 3 odour combinations: human vs.  
207 calf odour (H-C), human vs. outdoor air (H-O) and calf vs. outdoor air (C-O) (Figure 1b). For  
208 *An. coluzzii* experiments, only the human vs. calf odour (H-C) and human vs. outdoor air (H-  
209 O) combinations were carried out. In a single test day, 4 runs each lasting 30 minutes were  
210 carried out.

211 For each run, 20 uninfected controls and 20 gametocyte-exposed mosquitoes of  
212 similar age from the same experimental infection were simultaneously released in the  
213 downwind box of the apparatus. At the end of a run, the mosquitoes inside each of the two  
214 collecting boxes and the downwind box were removed with an aspirator, counted and kept in  
215 paper cups for subsequent analyzes (dissection of mosquito midgut and head/thorax, see  
216 below). Each batch of mosquitoes was tested once, so that a fresh batch of naive mosquitoes  
217 was used for each run. After each run, the olfactometer was washed with 70% alcohol to  
218 remove odour contaminants left from previous tests. Latex gloves were worn by the  
219 experimenter to avoid contamination of the equipment. The chronological order of the odour  
220 combinations was changed to eliminate possible confounding effect of odour combination and  
221 test time. The side of the tent connected to the collecting boxes was also switched to avoid  
222 positional effect. Different combinations of calves and humans were used as odour sources on

223 each testing day to obviate any individual effect (a total of 21 volunteers and 18 calves). All  
224 volunteers who served as the human odour source were male Burkinabe around 20-30 years  
225 old who lived in Bobo Dioulasso. Calves of about similar size and weight as human  
226 volunteers were used to equalize quantity of emitted odours.

227 Mosquito host choice was tested at different time points corresponding to two distinct  
228 phases of the parasite development: (i) Test period 1 (5-8 days post-infection (dpi))  
229 corresponding to the period of immature parasite development in the midgut (i.e. oocyst  
230 stage), (ii) Test period 2 (13-19 dpi) corresponding to the period of parasite transmission  
231 potential (when the sporozoites have invaded the mosquito salivary glands). The total number  
232 of run performed for each mosquito species, test period and odour combination is indicated in  
233 Table A1.

234 The day following behavioural testing, oocyst prevalence (proportion of *P.*  
235 *falciparum*-infected females) and intensity (number of oocysts in the midgut of infected  
236 females) were assessed by dissecting the midguts of mosquitoes that received an infectious  
237 blood-meal. Midguts were stained in a 1% mercurochrome solution and examined under a  
238 microscope (Vantaux et al., 2015). Heads and thoraces were used to determine sporozoite  
239 prevalence (proportion of infected females) by PCR assays for *An. coluzzii* females (Morassin  
240 et al., 2002) and by qPCR assays for the two other species (Boissière et al., 2013). Three  
241 groups of mosquitoes were thus obtained: (i) females that received a gametocyte-positive  
242 blood and became successfully infected; (ii) females that received a gametocyte-positive  
243 blood and remained uninfected; and (iii) females that received a heat-treated gametocytic  
244 blood (uninfected control).

## 245 2.4. Statistical analysis

246 We performed two sets of analyzes. In the first set, all data, including exposed-uninfected  
247 mosquitoes, were analyzed. In the second set, we excluded exposed-uninfected individuals to  
248 focus on the difference between infected and uninfected control mosquitoes. The two sets of  
249 analyzes yielded the same results, and, for the sake of clarity, only the second is reported in  
250 the main text (see Tables A2-A5 for the detailed output of the first set of analyzes).

251 All analyzes were performed in R (R Development Core Team, 2008). Binomial  
252 generalized linear mixed models (GLMMs) were fitted to investigate mosquito activation rate  
253 (proportion of mosquitoes caught in both collecting boxes out of the total number released)  
254 and odour choice (calculated separately for each odour combination, for example, human  
255 odour choice in the H-C combination was given as the proportion of mosquitoes entering  
256 human trap over the total mosquitoes entering both human and calf traps). In these models,  
257 infection treatment (two levels: infected and uninfected control), test period (two levels: test  
258 period 1 (oocyst stage) and test period 2 (sporozoite stage)), odour combination (three levels:  
259 H-C, H-O, and C-O for *An. gambiae* and *An. arabiensis*, and two levels: H-C, H-O for *An.*  
260 *coluzzii*) and relevant interactions were coded as fixed factors. Human volunteer and calf  
261 individual, and replicate were coded as random factors. Details of the fixed-effect and  
262 random-effect variables are shown in Tables A6 – A15. Because the *An. arabiensis* data were  
263 unbalanced (i.e. no data for carriers D and E during test period 1, see Table A1), activation  
264 rate and odour choice we analyzed separately for each test period. As there was complete  
265 separation of the data for one pair of human volunteer-calf individual in the H-C combination  
266 of test period 1 in the *An. arabiensis* data, volunteer was coded as a fixed factor in this host  
267 choice model only. We also verified for each combination, infection status and test period  
268 whether odour choice significantly differed from a random distribution between the two

269 collecting boxes or whether mosquitoes displayed a statistically significant attraction to one  
270 odour.

271 For model selection, we used the stepwise removal of terms, followed by likelihood  
272 ratio tests (LRT). Term removals that significantly reduced explanatory power ( $P < 0.05$ )  
273 were retained in the minimal adequate model (Crawley, 2007). Post-hoc tests were carried out  
274 using the *testFactor* function in *phia* R package (Rosario-Martinez et al., 2015).

## 275 **2.5. Ethical statement**

276 Ethical approval was obtained from the Centre Muraz Institutional Ethics Committee (A003-  
277 2012/CE-CM) and National Ethics Committee of Burkina Faso (2014-0040). The protocol  
278 conforms to the declaration of Helsinki on ethical principles for medical research involving  
279 human subjects (version 2002) and informed written consent were obtained from all  
280 volunteers. This study was carried out in strict accordance with the recommendations in the  
281 Guide for the Care and Use of Laboratory Animals of the National Institutes of Health. The  
282 protocol was approved by both the Office of Laboratory Animal Welfare of US Public Health  
283 Service (Assurance Number: A5928-01) and national committee of Burkina Faso (IRB  
284 registration #00004738 and FWA 00007038). Animals were cared for by trained personnel  
285 and veterinarians.

## 286 **3. Results**

### 287 **3.1. Infection**

288 Of the 1448 *An. coluzzii* mosquitoes exposed to an infectious blood meal, 622 became  
289 infected (percentage  $\pm$  95% confidence interval:  $42.96 \pm 2.55$  %, Figure A1), with a mean ( $\pm$   
290 se) parasite intensity of  $14.67 \pm 1.41$  (Figure A2). A total of 2161 *An. coluzzii* females (622  
291 infected + 1539 uninfected control mosquitoes) were used for the analyzes. Of the 744

292 exposed *An. gambiae*, 570 were infected ( $76.61 \pm 3.07$  %, Figure A1), with a mean parasite  
293 intensity of  $18.45 \pm 1.71$  (Figure A2). A total of 1260 *An. gambiae* females (570 infected +  
294 670 control) were used for the analyzes. Finally, of the 447 exposed *An. arabiensis*, 243 were  
295 infected ( $54.36 \pm 4.62$ %, Figure A1), with a mean parasite intensity of  $8.77 \pm 0.61$  (Figure  
296 A2). A total of 694 *An. arabiensis* females (243 infected + 451 uninfected controls) were used  
297 for the analyzes. The differences in parasite prevalence and intensity observed across the  
298 different mosquito species can be explained by the use of different wild parasite isolates  
299 containing varying densities of gametocytes.

### 300 3.2. Activation rate

301 *Anopheles coluzzii*. Overall, 228 of 622 infected mosquitoes and 548 of 1539 control  
302 mosquitoes left the downwind box of the olfactometer to fly upwind into one of the two  
303 collection boxes (activation rate of  $36.66 \pm 3.79$ % and  $35.61 \pm 2.39$ %, respectively). *P.*  
304 *falciparum* infection did not affect *An. coluzzii* activation rate ( $\chi^2_1 = 0.5$ ,  $P = 0.48$ ; Figure 2a).  
305 *An. coluzzii* displayed similar activation rate between the two test periods ( $\chi^2_1 = 0.08$ ,  $P = 0.78$ ,  
306 Figure 2a) and the three odour combinations ( $\chi^2_1 = 3.21$ ,  $P = 0.07$ , Figure 2a). Finally, there  
307 was no statistically significant interactions (test period x odour combination:  $\chi^2_1 = 1.06$ ,  $P =$   
308  $0.3$ ; infection x odour combination:  $\chi^2_1 = 0.22$ ,  $P = 0.64$ ; infection x test period:  $\chi^2_1 = 1.13$ ,  $P =$   
309  $0.29$ ; Table A6, Figure 2a).

310

311 *Anopheles gambiae*. The overall activation rates of infected and uninfected control  
312 mosquitoes were  $18.42 \pm 3.18$ % (105/570) and  $19.25 \pm 2.99$ % (129/670) respectively.  
313 Infection did not significantly affect *An. gambiae* activation rate ( $\chi^2_1 = 0.22$ ,  $P = 0.64$ , Figure  
314 2b). There was a marginally significant effect of test period ( $\chi^2_1 = 3.94$ ,  $P = 0.047$ ; Figure 2b).  
315 Although there was no significant main effect of odour combination on *An. gambiae*

316 activation rate ( $\chi^2_2 = 3.26$ ,  $P = 0.2$ ), there was a significant test period by odour combination  
317 interaction ( $\chi^2_2 = 8.44$ ,  $P = 0.01$ , Table A7) such that the H-O odour combination induced the  
318 highest mosquito activation rate during test period 1 and the lowest during test period 2  
319 (Figure 2b; Table A8). Finally, there was no infection by test period interaction ( $\chi^2_1 = 0.23$ ,  $P$   
320  $= 0.63$ ), and no infection by combination interaction ( $\chi^2_2 = 2.21$ ,  $P = 0.33$ ; Table A7).

321

322 *Anopheles arabiensis*. The activation rates of infected and uninfected control mosquitoes  
323 during test period 1 were  $37.62 \pm 9.45\%$  (38/101) and  $41.59 \pm 6.6\%$  (89/214) respectively.  
324 There was no influence of infection on *An. arabiensis* activation rate ( $\chi^2_1 = 0.58$ ,  $P = 0.45$ ;  
325 Figure 2c; Table A9). There was a significant effect of odour combination on activation rate  
326 ( $\chi^2_2 = 10.34$ ,  $P = 0.005$ ). In particular, mosquitoes were more activated in the C-O  
327 combination than in the H-O combination (post hoc tests: C-O vs. H-O:  $\chi^2_1 = 9.96$ ,  $P = 0.002$ ;  
328 H-C vs. C-O:  $\chi^2_1 = 1.79$ ,  $P = 0.18$ ; H-O vs. H-C:  $\chi^2_1 = 3.43$ ,  $P = 0.06$ ; Table A10). There was  
329 no significant interaction between infection and odour combination ( $\chi^2_2 = 4.95$ ,  $P = 0.08$ ;  
330 Table A9). The activation rate of infected *An. arabiensis* during test period 2 ( $16.90 \pm 6.16\%$ ,  
331  $n=142$ ) was lower than that of uninfected individuals ( $29.11 \pm 5.78\%$ ,  $n=237$ ) ( $\chi^2_1 = 6.69$ ,  $P =$   
332  $0.01$ ; Figure c). We also found a significant effect of odour combination ( $\chi^2_2 = 6.61$ ,  $P = 0.04$ ),  
333 such that mosquitoes were more activated in the H-O combination compared to the two other  
334 combinations (post hoc tests: H-O vs. H-C:  $\chi^2_1 = 4.97$ ,  $P = 0.03$ ; H-O vs. C-O:  $\chi^2_1 = 4.68$ ,  $P =$   
335  $0.03$ ; H-C vs. C-O:  $\chi^2_1 = 0.01$ ,  $P = 0.9$ ; Table A11). We found no significant effect of  
336 infection by odour combination interaction ( $\chi^2_2 = 0.18$ ,  $P = 0.92$  Figure 2c; Table A9).

337

### 338 3.3. Odour choice

339

340 *Anopheles coluzzii*. Infected and uninfected mosquitoes showed similar odour choice (H-C:  $\chi^2_1 = 0.73, P = 0.4$ ; H-O:  $\chi^2_1 = 1.24, P = 0.43$ ) with an overall attraction toward human odours  
341 of  $71.70 \pm 4.32\%$  in the H-C and of  $87.47 \pm 3.42\%$  in the H-O combinations (Figure 3a).  
342 There was no significant difference in odour choice between test period 1 and 2 in both the H-  
343 C ( $\chi^2_1 = 0.03, P = 0.87$ ) and the H-O odour combinations ( $\chi^2_1 = 0.02, P = 0.89$ ). Finally, there  
344 was no interaction between test period and infection in both the H-C ( $\chi^2_1 = 0.31, P = 0.58$ )  
345 and H-O combinations ( $\chi^2_1 = 0.62, P = 0.43$ ; Figure 3a, Table A12).

347

348 *Anopheles gambiae*. In all three odour combinations, infected and uninfected mosquitoes  
349 displayed similar odour choice (H-C:  $\chi^2_1 = 0.12, P = 0.73$ ; H-O:  $\chi^2_1 = 2.92, P = 0.09$ ; C-O:  $\chi^2_1$   
350  $= 0.75, P = 0.75$ ) with an overall attraction to human odours of  $76.12 \pm 10.21\%$  in the H-C  
351 and  $69.14 \pm 10.06\%$  in the H-O combinations, and a repulsion by calf odours of  $62.79 \pm$   
352  $10.22\%$  in the C-O combination (Figure 3b). There was no significant effect of test period (H-  
353 C combination:  $\chi^2_1 = 1.96, P = 0.16$ ; H-O combination:  $\chi^2_1 = 1.66, P = 0.2$ ; C-O combination:  
354  $\chi^2_1 = 0.4, P = 0.53$ ) on *An. gambiae* odour choice. We found a significant infection by test  
355 period interaction for the C-O combination ( $\chi^2_3 = 4.67, P = 0.03$ ) with calf odours inducing a  
356 stronger repellence to infected mosquitoes than to uninfected mosquitoes during test period 1  
357 and inversely during test period 2; Figure 3b, Table A13). Finally, there was no significant  
358 interaction between infection and test period in the H-C and H-O combinations ( $\chi^2_1 = 0.47, P$   
359  $= 0.49$  and  $\chi^2_1 = 0.82, P = 0.37$ , respectively).

360

361 *Anopheles arabiensis*. For both test periods and all odour combinations, infected and  
362 uninfected mosquitoes displayed similar host choice (test period 1, H-C:  $\chi^2_1 = 0.87, P = 0.35$ ;  
363 H-O:  $\chi^2_1 = 0.16, P = 0.69$ ; C-O:  $\chi^2_1 = 1.2, P = 0.27$ ; test period 2, H-C:  $\chi^2_1 = 0.36, P = 0.55$ , H-  
364 O:  $\chi^2_1 = 1.39, P = 0.24$ , C-O:  $\chi^2_1 = 0.06, P = 0.81$ ; Figure 3c, Tables A14 and A15) with an



365 attraction to human odours of  $88.23 \pm 7.66\%$  in the H-C and  $60.56 \pm 11.37\%$  in the H-O  
366 combinations and a repulsion by calf odour of  $64.19 \pm 10.44\%$  in the C-O odour combination.  
367 There was no influence of volunteer/calf individual on odour choice (test period 1, H-C:  $\chi^2_1 =$   
368  $0.69$ ,  $P = 0.41$ ; Table A14).

369

#### 370 **4. Discussion**

371 Several studies have demonstrated that malaria parasites can alter important behavioural  
372 features of their mosquito vectors in a stage dependant manner: oocyst-infected mosquitoes  
373 show reduced attraction to vertebrate odours and reduced avidity to feed, and, in contrast,  
374 sporozoite-infected individuals show enhanced attraction to vertebrate odours and enhanced  
375 avidity to feed (Hurd, 2003; Lefèvre and Thomas, 2008; Cator et al., 2012; Caljon et al.,  
376 2016). These behavioural alterations likely increase parasite transmission, provided that  
377 mosquito feeds are taken on a suitable vertebrate host species for the parasite. Our results  
378 indicate that, regardless of parasite developmental stage, *P. falciparum* infection did not alter  
379 mosquito activation rate, a surrogate of mosquito motivation to feed. While this finding  
380 contrasts with earlier studies (Rossignol et al., 1986; Cator et al., 2013; Smallegange et al.,  
381 2013), it supports two recent other studies, including one on *An. coluzzii* experimentally  
382 infected with sympatric wild isolates of *P. falciparum* (Cornet et al., 2013b; Vantaux et al.,  
383 2015), and suggests that manipulation of mosquito activity and response to host odours may  
384 not be a universal phenomenon. The expression of parasite-induced behavioural alterations,  
385 like any other phenotypic traits, may depend on local coevolutionary processes (Thompson,  
386 2005). Hence, natural selection might not favour the evolution of manipulation in the studied  
387 populations if, for example, mosquito behaviour already ensures high parasite transmission or  
388 if the mosquito vector has evolved resistance (Daoust et al. 2015). Further investigations

389 using sympatric and allopatric host-parasite combinations will be essential to integrate these  
390 local co-adaptation phenomena.

391 Our results also showed similar attractiveness of host odours to infected and  
392 uninfected mosquitoes. The overall expression pattern of mosquito host choice was consistent  
393 with a high degree of anthropophily in both infected and uninfected *An. coluzzii*, *An. gambiae*  
394 and *An. arabiensis*. The only significant effect of infection on mosquito odour choice was  
395 seen in sporozoite-infected *An. gambiae* which were less repelled by calf odours compared to  
396 oocyst-infected counterparts (Figure 3b). This result contrasts with the hypothesis of a  
397 parasite manipulation of mosquito odour preference and the expectation that sporozoite-  
398 infected individuals should be steered away from the odours of inappropriate vertebrate hosts.  
399 Although the precise reason behind this effect is currently unclear, it might be a mosquito  
400 response, and interactions among mosquito resources, infection and requirement of a blood-  
401 meal can be suspected. Because *Plasmodium* parasites utilize mosquito resources to develop  
402 and mature, sporozoite-infected *An. gambiae* females might be less choosy regarding the  
403 nature of the blood source, hence explaining this increased attraction to calf odour. At this  
404 stage, this remains speculative and further experiments are required to investigate the  
405 mechanisms underlying this effect and to explain why this pattern was not observed in *An.*  
406 *coluzzii* and *An. arabiensis*.

407 Our prediction was that sporozoites of *P. falciparum* may have evolved the ability to  
408 influence mosquito preference in a way that increases contact with humans - the appropriate  
409 vertebrate host of *P. falciparum* - by inducing in the mosquito vector a sensory bias for host  
410 odours that are correlated with suitability for the parasite. When simultaneously exposed to  
411 odours from calf and human, 71% and 76% of both sporozoite-infected and uninfected *An.*  
412 *coluzzii* and *An. gambiae* were retrieved from the human trap, hence confirming the  
413 anthropophilic behaviour of these species (Costantini et al. 1996; Costantini et al. 1999;

414 Dekker et al. 2001; Takken and Verhulst 2013). Such anthropophily already ensures relatively  
415 high probability of transmission toward the appropriate host, perhaps making parasite  
416 manipulation of mosquito host choice useless in this system (i.e. weak selective pressures for  
417 its evolution). In other words, it is possible that, in this system, the balance between the  
418 transmission benefits of an increased preference for humans (e.g. from an anthropophily of 70  
419 to 90%) and the costs associated with manipulation (Poulin, 1994) explain why this change  
420 has not evolved. Alternatively, it is possible that the parasite's ability to modify its mosquito  
421 host choice did evolve but was not expressed here because of our experimental design.

422         First, while our olfactometer allows the study of long-range odour-mediated  
423 attractiveness, the full sequence of mosquito host-seeking process also includes short-range  
424 stimuli. Odour-mediated preference is critical at the initial step of host location; however final  
425 host decision might be influenced by cues other than odours, thereby determining alternative  
426 patterns of host preference. Indeed, olfactometer obviates stimuli such as visual cues, heat,  
427 moist, convective currents, and host movements. Under this scenario, sporozoite-infected *An.*  
428 *gambiae* would present similar host preference as uninfected counterparts in the early stages  
429 of the host-seeking process, when it mostly responds to host odours (i.e. long-range host  
430 preference), and then display increased attraction to humans at a shorter range, when other  
431 cues become more important (i.e. short-range host preference). In addition, we did not control  
432 the quantity of emitted host odour which could also affect mosquito behavioural responses  
433 (Costantini et al., 1996).

434         Second, our experiments were conducted between 6.30.pm and 11.30.pm while  
435 mosquito activation spans from 6.00.pm until early morning the following day with a peak of  
436 activity occurring around midnight. This activity peak is correlated with human resting  
437 behaviour to presumably maximize mosquito fitness (Lehane 2005). During this time frame,  
438 human are less defensive, possibly facilitating feeding and reduce mosquito mortality. Malaria

439 parasites may have evolved the ability to finetune manipulation to the temporal behaviour of  
440 both the vectors and the vertebrate host. Under this scenario, manipulation of host choice  
441 might occur later in the night (e.g. during the peak of mosquito activity), and we hence may  
442 have missed it.

443         Third, *An. gambiae* and *An. coluzzii* mosquitoes from colonies continually replenished  
444 with F1 from wild-caught females were used here and it will also be important to use F0 from  
445 field mosquitoes since rearing insects in the laboratory for many generations is unlikely to  
446 represent the genetic diversity observed in nature.

447         Fourth, the uninfected control mosquitoes were fed on the same blood as infected  
448 mosquitoes but in which gametocytes were heat-inactivated. This procedure allows avoiding  
449 confounding effects of different blood origins on mosquito fitness and behavioural responses.  
450 However, these heat-killed gametocytes might trigger a mosquito immune response, which in  
451 turn, might affect mosquito behaviour. Although no study has, to our knowledge, directly  
452 explored whether heat-killed gametocytes can stimulate a mosquito immune response, there is  
453 evidence that alive gametocytes blood triggers a mosquito immune response that does not  
454 occur with heat-killed gametocytes (Mendes et al. 2008, 2011). In addition, the differences in  
455 immune gene expression between mosquitoes challenged with alive and dead *P. falciparum*  
456 gametocytes is similar to that observed between mosquitoes challenged with alive *P. berghei*  
457 gametocytes and mosquitoes that received a parasite-free blood-meal (Mendes et al. 2008,  
458 2011). These results suggest that heat-killed *P. falciparum* gametocytes and parasite-free  
459 blood-meal may induce similar mosquito immune response. However, a study showed that a  
460 challenge with heat-killed *Escherichia coli* can generate mosquito behavioural changes  
461 similar to that observed in mosquitoes infected with rodent malaria parasites (Cator et al  
462 2013). Overall, future studies should ideally include two control groups: heat-inactivated  
463 gametocytes from the same carrier (to avoid effects of different blood-meal sources on

464 mosquito behaviour) and (ii) uninfected blood from a parasite-free donor (to avoid possible  
465 effects of heat-killed gametocytes on mosquito behaviour).

466 Finally, it is possible that the expression of parasite manipulation of host preference is  
467 more pronounced in some mosquito-parasite combinations than in others. In particular, we  
468 predicted that the expression of parasite manipulation of vector host choice might be more  
469 obvious in *An. arabiensis*, a presumably more zoophilic/opportunistic vector species (Takken  
470 and Verhulst, 2013). When simultaneously exposed to calf and human odours, we found that  
471 90 % of *An. arabiensis* were retrieved from the human trap. This result contrasts with most  
472 existing studies on *An. arabiensis* host preference, which report an overall high degree of  
473 zoophily (Takken and Verhulst, 2013). Using odour-baited entry traps in Tanzania, Mahande  
474 et al. (2007), for example, showed a 90% zoophily in *An. arabiensis*. In contrast, of an  
475 estimated 1,800 field *An. arabiensis* collected using the same technique in Central Burkina  
476 Faso, slightly more than 8% were collected in the calf-baited trap, suggesting a high degree of  
477 anthropophily (Costantini et al., 1998). Our findings support the idea that West African  
478 populations of *An. arabiensis* may be generally more anthropophilic than East African ones  
479 (Costantini et al., 1999) and emphasizes that the anthropophilic/zoophilic label given to  
480 malaria mosquito species must be carefully interpreted and refer to populations rather than  
481 whole taxonomic unit.

482 We observed no parasite manipulation of mosquito odour-mediated host choice in the  
483 natural associations between *P. falciparum* and three of its major vector species, *An. coluzzii*,  
484 *An. gambiae*, and *An. arabiensis*. All three species were rather anthropophilic regardless of  
485 their infectious status. Further work is required to explore whether *P. falciparum* is able to  
486 modify its mosquito vertebrate choice in a way that increase transmission toward suitable host  
487 species. While our study examined the odour-mediated long-range mosquito host choice,  
488 determining the origin of blood-meals retrieved from uninfected, oocyst-infected and

489 sporozoite-infected mosquitoes in the field may reveal the existence of specific manipulation.  
490 Future studies on specific manipulation in other vector systems would provide important  
491 information on the ecology and epidemiology of vector-borne diseases. A recent study  
492 suggested that the rodent- or bird-specialized *Borrelia* genospecies were unable to alter  
493 attraction of the generalist tick *Ixodes ricinus* to mouse odour (Berret and Voordouw, 2015).  
494 However, this study used ticks collected from the field and was not able to establish a causal  
495 relationship between *Borrelia* infection and attraction to mouse odour (Berret and Voordouw,  
496 2015). Other possibly good model systems to study specific manipulation in vector-borne  
497 diseases are tsetse fly-transmitted trypanosomes. For example, *Glossina palpalis gambiensis*  
498 has a broad range of hosts in central Africa (humans, reptiles, bushbuck, and ox) and is the  
499 main vector of *Trypanosoma brucei gambiense* responsible for the medically important  
500 Human African trypanosomiasis. We would predict that once infected, flies are more attracted  
501 by human cues than by those of other vertebrates. Finally, parasite manipulation of mosquito  
502 host choice could theoretically occur at the intraspecific level (among different human  
503 individuals), with infected vectors biting more than expected less-immune hosts.

504

#### 505 **Acknowledgments**

506 This work was supported by the Agence Nationale de Recherche (grant number: 11-PDOC-  
507 006-01). We would like to thank all children and their parents for participating in this study,  
508 the local authorities for their support, as well as all the volunteers for the dual-port  
509 olfactometer assays. We are very grateful to the IRSS staff in Burkina Faso for technical  
510 assistance.

511

512

#### 513 **References**

- 514 Anderson, R.A., Koella, J.C., Hurd, H., 1999. The effect of *Plasmodium yoelii nigeriensis*  
515 infection on the feeding persistence of *Anopheles stephensi* Liston throughout the  
516 sporogonic cycle. Proc. Biol. Sci. 266: 1729-1733.
- 517 Berret, J., Voordouw, M.J., 2015. Lyme disease bacterium does not affect attraction to rodent  
518 odour in the tick vector. Parasite. Vectors. 8: 249.
- 519 Boissière, A., Gimonneau, G., Tchioffo, M.T., Abate, L., Bayibeki, A., Awono-Ambéné, P.H.,  
520 Nsango, S.E., Morlais, I., 2013. Application of a qPCR assay in the investigation of  
521 susceptibility to malaria infection of the M and S molecular forms of *An. gambiae* s.s .  
522 in Cameroon. PLoS ONE. 8: e54820.
- 523 Caljon, G., De Muylder, G., Durnez, L., Jennes, W., Vanaerschot, M., Dujardin, J.C., 2016.  
524 Alice in microbes' land: adaptations and counter-adaptations of vector-borne parasitic  
525 protozoa and their hosts. FEMS Microbiol. Rev. 40: 664-685.
- 526 Cator, L.J., George, J., Blanford, S., Murdock, C.C., Baker, T.C., Read, A.F., Thomas, M.B.,  
527 2013. 'Manipulation' without the parasite: altered feeding behaviour of mosquitoes is not  
528 dependent on infection with malaria parasites. Proc. Biol. Sci. 280: 20130711.
- 529 Cator, L.J., Lynch, P.A., Read, A.F., Thomas, M.B., 2012. Do malaria parasites manipulate  
530 mosquitoes? Trends Parasitol. 28: 467-470.
- 531 Cator, L., Lynch, P.A., Thomas, M.B., Read, A.F., 2014. Alterations in mosquito behaviour  
532 by malaria parasites: potential impact on force of infection. Malar. J.13: 164.
- 533 Cornet, S., Nicot, A., Rivero, A., Gandon, S., 2013a. Malaria infection increases bird  
534 attractiveness to uninfected mosquitoes. Ecol. Lett. 16: 323-329.
- 535 Cornet, S., Nicot, A., Rivero, A., Gandon, S., 2013b. Both infected and uninfected mosquitoes  
536 are attracted toward malaria infected birds. Malar. J. 12: 179.
- 537 Costantini, C., Gibson, G., Sagnon, N., Della Torre, A., Brady, J., Coluzzi, M., 1996.  
538 Mosquito responses to carbon dioxide in a west African Sudan savanna village. Med. Vet.

- 539 Entomol. 10: 220-227.
- 540 Costantini, C., Sagnon, N., della Torre, A., Coluzzi, M., 1999. Mosquito behavioural aspects  
541 of vector-human interactions in the *Anopheles gambiae* complex. *Parassitologia*. 41:  
542 209-217.
- 543 Costantini, C., Sagnon, N., della Torre, A., Diallo, M., Brady J., Gibson G., Coluzzi, M., 1998.  
544 Odour-mediated host preferences of West African mosquitoes, with particular reference  
545 to malaria vectors. *Am. J. Trop. Med. Hyg.* 58: 56-63.
- 546 Crawley MJ. 2007. *The R book*. John Wiley & Sons Ltd, England.
- 547 Dabiré, R.K., Namountougou, M., Sawadogo, S.P., Yaro, L.B., Toé, H.K., Ouari, A.,  
548 Gouagna, L.C., Simard, F., Chandre, F., Baldet, T., Bass, C., Diabaté, A., 2012.  
549 Population dynamics of *Anopheles gambiae* s.l. in Bobo-Dioulasso city: bionomics,  
550 infection rate and susceptibility to insecticides. *Parasite. Vectors*. 5: 127-135.
- 551 Dabiré, R.K., Sawadogo, P.S., Hien, D.F., Bimbilé-Somda, N.S., Soma, D.D., Millogo, A.,  
552 Baldet, T., Gouagna, L.C., Simard, F., Lefèvre, T., Diabaté, A., Lees, R.S., Gilles, J.R.,  
553 2014. Occurrence of natural *Anopheles arabiensis* swarms in an urban area of Bobo-  
554 Dioulasso city, Burkina Faso, West Africa. *Acta. Trop.* 132: S35-41.
- 555 Daoust, S.P., King, K.C., Brodeur, J., Roitberg, B., Roche, B., Thomas, F., 2015. Making the  
556 best of a bad situation: host partial resistance and by-pass to behavioural manipulation by  
557 parasites? *Trends Parasitol.* 31: 413-418.
- 558 De Moraes, C.M., Stanczyk, N.M., Betz, H.S., Pulido, H., Sim, D.G., Read, A.F., Mescher,  
559 M.C., 2014. Malaria-induced changes in host odours enhance mosquito attraction. *Proc*  
560 *Natl Acad. Sci. USA*. 111: 11079-11084.
- 561 Dobson, A.P., 1988. The population biology of parasite-induced changes in host behaviour. *Q.*  
562 *Rev. Biol.* 63: 139-165.
- 563 Fanello, C., Santolamazza, F., della Torre, A., 2002. Simultaneous identification of species



- 564 and molecular forms of the *Anopheles gambiae* complex by PCR-RFLP. Med. Vet.  
565 Entomol. 16: 461-464.
- 566 Gouagna, L.C., Bonnet, S., Gounoue, R., Verhave, J.P., Eling, W., Sauerwein, R., Boudin, C.,  
567 2004. Stage-specific effects of host plasma factors on the early sporogony of autologous  
568 *Plasmodium falciparum* isolates within *Anopheles gambiae*. Trop. Med. Int. Health. 9:  
569 937-948.
- 570 Hien, D.F.S., Dabiré, K.R., Roche, B., Diabaté, A., Yerbanga, S., Cohuet, A., Yameogo, B.K.,  
571 Gouagna, L.C., Hopkins, R.J., Ouedraogo, G.A., Simard, F., Ouedraogo, J.B., Ignell, R.,  
572 Lefèvre, T., 2016. Plant-mediated effects on mosquito capacity to transmit human  
573 malaria. PLoS Pathog. 1–17.
- 574 Hughes, D.P., Brodeur, J., Thomas, F., 2012. Host Manipulation by Parasites (1st ed.).  
575 Oxford: Oxford University Press.
- 576 Hurd, H., 2003. Manipulation of medically important insect vectors by their parasites. Annu.  
577 Rev. Entomol. 48: 141-161.
- 578 Jacquin, L., Mori, Q., Pause, M., Steffen, M., Médoc, V., 2014. Non-specific manipulation of  
579 gammarid behaviour by *P. minutus* parasite enhances their predation by definitive bird  
580 hosts. PLoS ONE. 9: 1-12.
- 581 Kaldonski, N., Perrot-Minnot, M.J., Motreuil, S., Cézilly, F., 2008. Infection with  
582 acanthocephalans increases the vulnerability of *Gammarus pulex* (Crustacea,  
583 Amphipoda) to non-host invertebrate predators. Parasitology. 135: 627-632.
- 584 Koella, J.C., Packer, M.J., 1996. Malaria parasites enhance blood-feeding of their naturally  
585 infected vector *Anopheles punctulatus*. Parasitology. 113: 105-109.
- 586 Koella, J.C., Rieu, L., Paul, R.E.L. 2002. Stage-specific manipulation of a mosquito's host-  
587 seeking behaviour by the malaria parasite *Plasmodium gallinaceum*. Behav. Ecol.13:  
588 816-820.

- 589 Koella, J.C., Sørensen, F.L., Anderson, R.A., 1998. The malaria parasite, *Plasmodium*  
590 *falciparum*, increases the frequency of multiple feeding of its mosquito vector,  
591 *Anopheles gambiae*. Proc. Biol. Sci. 265: 763-768.
- 592 Lacroix, R., Mukabana, W.R., Gouagna, L.C., Koella, J.C., 2005. Malaria infection increases  
593 attractiveness of humans to mosquitoes. PLoS Biol. 3: 1590-1593.
- 594 Lafferty, K.D., Morris, A.K., 1996. Altered behavior of parasitized killifish increases  
595 susceptibility to predation by bird final hosts. Ecology. 77: 1390-1397.
- 596 Lagrue, C., Güvenatam, A., Bollache, L., 2013. Manipulative parasites may not alter  
597 intermediate host distribution but still enhance their transmission: field evidence for  
598 increased vulnerability to definitive hosts and non-host predator avoidance. Parasitology.  
599 140: 258-265.
- 600 Lagrue, C., Kaldonski, N., Perrot-Minnot, M.J., Motreuil, S., Bollache, L., 2007.  
601 Modification of hosts' behaviour by a parasite: Field evidence for adaptive manipulation.  
602 Ecology. 88: 2839-2847.
- 603 Lefèvre, T., Adamo, S.A., Biron, D.G., Missé, D., Hughes, D., Thomas, F., 2009a. Invasion of  
604 the body snatchers: the diversity and evolution of manipulative strategies in host-parasite  
605 interactions. Adv. Parasitol. 68: 45-83.
- 606 Lefèvre, T., Gouagna, L.C., Dabiré, K.R., Elguero, E., Fontenille, D., Costantini, C., Thomas  
607 F. 2009b. Evolutionary lability of odour-mediated host preference by the malaria vector  
608 *Anopheles gambiae*. Trop. Med. Int. Health. 14: 228-236.
- 609 Lefèvre, T., Gouagna, L.C., Dabiré, K.R., Elguero, E., Fontenille, D., Renaud, F., Costantini,  
610 C., Thomas, F., 2010. Beer consumption increases human attractiveness to malaria  
611 mosquitoes. PLoS ONE. 5: e9546.
- 612 Lefèvre, T., Koella, J.C., Renaud, F., Hurd, H., Biron, D.G., Thomas, F., 2006. New prospects  
613 for research on manipulation of insect vectors by pathogens. PLoS Pathog. 2: e72.

- 614 Lefèvre, T., Thomas F., 2008. Behind the scene, something else is pulling the strings:  
615 Emphasizing parasitic manipulation in vector-borne diseases. *Infect. Genet. Evol.* 8:  
616 504–519.
- 617 Lehane, M.J., 2005. *The Biology of Blood-Sucking in Insects*, Second Edition. New York,  
618 Cambridge University Press.
- 619 Lyimo, I.N., Ferguson, H.M., 2009. Ecological and evolutionary determinants of host species  
620 choice in mosquito vectors. *Trends Parasitol.* 25: 189-196.
- 621 Mahande, A., Mosha, F., Mahande, J., Kweka, E., 2007. Feeding and resting behaviour of  
622 malaria vector, *Anopheles arabiensis* with reference to zooprophylaxis. *Malar. J.* 6: 100.
- 623 Médoc, V., Beisel, J., 2009. Field evidence for non-host predator avoidance in a manipulated  
624 amphipod. *Naturwissenschaften.* 96: 513-523.
- 625 Médoc, V., Rigaud, T., Bollache L., Beisel, J., 2009. A manipulative parasite increasing an  
626 antipredator response decreases its vulnerability to a nonhost predator. *Anim. Behav.* 77:  
627 1235-1241.
- 628 Mendes, A.M., Awono-Ambene, P.H., Nsango, S.E., Cohuet, A., Fontenille, D., Kafatos, F.C.,  
629 Christophides, G.K., Morlais, I., Vlachou, D., 2011. Infection Intensity-Dependent  
630 Responses of *Anopheles gambiae* to the African Malaria Parasite *Plasmodium falciparum*.  
631 *Infect. Immun.* 79: 4708-4715.
- 632 Mendes, A.M., Schlegelmilch, T., Cohuet, A., Awono-Ambene, P., De Iorio, M., Fontenille,  
633 D., Morlais, I., Christophides, G.K., Kafatos, F.C., Vlachou, D., 2008. Conserved  
634 Mosquito/Parasite Interactions Affect Development of *Plasmodium falciparum* in Africa.  
635 *PLoS Pathog.* 4: e1000069.
- 636 Moore, J., 2002. *Parasites and the behaviour of animals*. New York: Oxford University Press.
- 637 Morassin, B., Fabre, R., Berry, A., Magnaval, J.F., 2002. One year's experience with the  
638 polymerase chain reaction as a routine method for the diagnosis of imported malaria. *Am.*

- 639 J. Trop. Med. Hyg. 66: 503-508.
- 640 Mouritsen, K.N., Poulin, R. 2003. Parasite-induced trophic facilitation exploited by a non-  
641 host predator: A manipulator's nightmare. Int. J. Parasitol. 33: 1043-1050.
- 642 Ngoubangoye, B., Boundenga L., Arnathau, C., Mombo, I.M., Durand, P., Tsoumbou, T.,  
643 Otoro, B.V., Sana, R., Okouga, A.P., Moukodoum, N., Willaume, E., Herbert, A.,  
644 Fouchet, D., Rougeron, V., Ba, C.T., Ollomo, B., Paupy, C., Leroy, E.M., Renaud, F.,  
645 Pontier, D., Prugnolle, F., 2016. The host specificity of ape malaria parasites can be  
646 broken in confined environments. Int. J. Parasitol. 46: 737-744.
- 647 Ouédraogo, A.L., Guelbéogo, W.M., Cohuet, A., Morlais, I., King, J.G., Gonçalves, B.P.,  
648 Bastiaens, G.J.H., Vaanhold, M., Sattabongkot, J., Wu, Y., Coulibaly, M., Ibrahima, B.,  
649 Jones, S., Morin, M., Drakeley, C., Dinglasan, R.R., Bousema, T., 2013. A protocol for  
650 membrane feeding assays to determine the infectiousness of *P. falciparum* naturally  
651 infected individuals to *Anopheles gambiae*. Malar. World J. 4: 17–20.
- 652 Perkins, S.L., 2014. Malaria's many mates: past, present, and future of the systematics of the  
653 order Haemosporida. J. Parasitol. 100: 11–25.
- 654 Poulin, R., 1994. The evolution of parasite manipulation of host behaviour: a theoretical  
655 analysis. Parasitology. 109: S109–S118.
- 656 Poulin, R., 2010. Parasite Manipulation of Host Behaviour. In edited by H. J. Brockmann, T. J.  
657 Roper, M. Naguib, K. E. Wynne-Edwards, J. C. Mitani, & L. W. Simmons (Eds.),  
658 Advances in the study of behaviour (pp.151–86). USA: Elsevier Inc.
- 659 Prugnolle, F., Durand, P., Ollomo, B., Duval, L., Ariey, F., Arnathau, C., Gonzalez, J.P.,  
660 Leroy, E., Renaud, F., 2011. A fresh look at the origin of *Plasmodium falciparum*, the  
661 most malignant malaria agent. PLoS Pathog. 7: e1001283.
- 662 Rayner, J.C., Liu, W., Peeters, M., Sharp, P.M., Hahn, B.H., 2011. A plethora of *Plasmodium*  
663 species in wild apes: A source of human infection? Trends Parasitol. 27: 222–229.

- 664 R Development Core Team. 2008. R: A Language and Environment for Statistical Computing.
- 665 Rosario-Martinez, H. De, Fox, J., Team, R.C., 2015. Phia: Post-Hoc Interaction Analysis.
- 666 Rossignol, P.A., Ribeiro, J.M.C., Spielman, A., 1984. Increased intradermal probing time in  
667 sporozoite-infected mosquitoes. *Am. J. Trop. Med. Hyg.* 33: 17–20.
- 668 Rossignol, P.A., Ribeiro, J.M., Spielman, A., 1986. Increased biting rate and reduced fertility  
669 in sporozoite-infected mosquitoes. *Am. J. Trop. Med. Hyg.* 35: 277–279.
- 670 Roux, O., Vantaux, A., Roche, B., Yameogo, K.B., Dabiré, K.R., Diabaté, A., Simard, F.,  
671 Lefèvre, T., 2015. Evidence for carry-over effects of predator exposure on pathogen  
672 transmission potential. *Proc. Biol. Sci.* 282: 20152430.
- 673 Sangare, I., Michalakis, Y., Yameogo, B., Dabire, R., Morlais, I., Cohuet, A., 2013. Studying  
674 fitness cost of *Plasmodium falciparum* infection in malaria vectors: validation of an  
675 appropriate negative control. *Malar. J.* 12: 2.
- 676 Santolamazza, F., Mancini, E., Simard, F., Qi, Y., Tu, Z., della Torre, A., 2008. Insertion  
677 polymorphisms of SINE200 retrotransposons within speciation islands of *Anopheles*  
678 *gambiae* molecular forms. *Malar. J.* 7: 163.
- 679 Schwartz, A., Koella J.C., 2001. Trade-offs, conflicts of interest and manipulation in  
680 *Plasmodium*-mosquito interactions. *Trends Parasitol.* 17: 189–194.
- 681 Seppälä, O., Jokela, J., 2008. Host manipulation as a parasite transmission strategy when  
682 manipulation is exploited by non-host predators. *Proc. Biol. Sci.* 4: 663–666.
- 683 Seppälä, O., Karvonen, A., Valtonen, E.T., 2012. Behavioural mechanisms underlying  
684 ‘specific’ host manipulation by a trophically transmitted parasite. *Evol. Ecol. Res.* 14:  
685 73–81.
- 686 Seppälä, O., Valtonen, E.T., Benesh, D.P., 2008. Host manipulation by parasites in the world  
687 of dead-end predators: adaptation to enhance transmission? *Proc. Biol. Sci.* 275: 1611–  
688 1615.

- 689 Smallegange, R.C., van Gemert, G.J., van de Vegte-Bolme, r M., Gezan, S., Takken, W.,  
690 Sauerwein, R.W., Logan, J.G., 2013. Malaria Infected Mosquitoes Express Enhanced  
691 Attraction to Human Odour. PLoS ONE. 8: 8–10.
- 692 Takken, W., Verhulst, N.O., 2013. Host Preferences of Blood-Feeding Mosquitoes. Annu.  
693 Rev. Entomol. 433–453.
- 694 Thompson, J.N., 2005. The geographic mosaic theory of coevolution. USA: University of  
695 Chicago Press.
- 696 Vantaux, A., Dabiré, K., Cohuet, A., Lefèvre, T., 2014. A heavy legacy: offspring of malaria-  
697 infected mosquitoes show reduced disease resistance. Malar. J. 13: 442.
- 698 Vantaux, A., de Sales Hien, D.F., Yameogo, B., Dabiré, K.R., Thomas, F., Cohuet, A.,  
699 Lefèvre, T., 2015. Host-seeking behaviours of mosquitoes experimentally infected with  
700 sympatric field isolates of the human malaria parasite *Plasmodium falciparum*: no  
701 evidence for host manipulation. Frontiers. Ecol. Evol. 3: 1–12.
- 702 Verhulst, N.O., Loonen, J.A., Takken, W., 2013. Advances in methods for colour marking of  
703 mosquitoes. Parasite. Vectors. 6: 200.
- 704 Wekesa, J.W., Copeland, R.S., Mwangi R.W., 1992. Effect of *Plasmodium falciparum* on  
705 blood feeding behaviour of naturally infected *Anopheles* mosquitoes in western Kenya.  
706 Am. J. Trop. Med. Hyg. 47: 484–488.
- 707
- 708

709

710 **Figure legends**

711

712 **Figure 1.** Schematic representations of (a) the dual-choice olfactometer and (b) the  
713 behavioural assays. C1 represents the tent containing calf 1, H1 represents the tent containing  
714 human volunteer 1, N represents the tent with outdoor air (control), O represents the  
715 Olfactometer, Y corresponds to mosquito infected status,  $\Phi$  corresponds to mosquito  
716 uninfected status, R and Y represent the colours of the mosquitoes which are red and yellow  
717 respectively. The position of the tents was switched among replicates to account for side  
718 effect. Test period 1 and 2 correspond to the oocyst and sporozoite developmental stages in  
719 infected mosquitoes, respectively.

720

721 **Figure 2.** Mosquito activation rate, expressed as the proportion of mosquitoes caught in both  
722 collecting boxes out of the total number released in the downwind box for each treatment  
723 combination. (a) *Anopheles coluzzii*, (b) *Anopheles gambiae*, (c) *Anopheles arabiensis*.  
724 Numbers inside the bars indicate the total number of mosquitoes released across all runs.  
725 Error bars show the 95% confidence interval. C-O: for calf odour vs outdoor air combination,  
726 H-C: human odour vs calf odour combination, H-O: human odour vs outdoor air combination.  
727 Test Period 1 and Test Period 2 correspond to the oocyst and sporozoite stages in infected  
728 mosquitoes, respectively.

729

730 **Figure 3.** Mosquito odour-mediated choice - expressed as the proportion of mosquitoes  
731 caught in one collecting box out of the total number retrieved from both collecting boxes. (a)  
732 *An. coluzzii*, (b) *An. gambiae* (c) *An. arabiensis*. Data show proportion  $\pm$  95% confidence  
733 interval across all runs. Numbers indicate the total numbers of mosquitoes in both traps across

734 all runs. The annotation human, calf, control corresponds to source of odour the mosquitoes  
735 chose Test Period 1 and Test Period 2 correspond to the oocyst and sporozoite stages in  
736 infected mosquitoes, respectively. (\* indicates significant bias toward an odour source; \*:  $P <$   
737 0.05, \*\*:  $P < 0.01$ , \*\*\*:  $P < 0.001$ ).



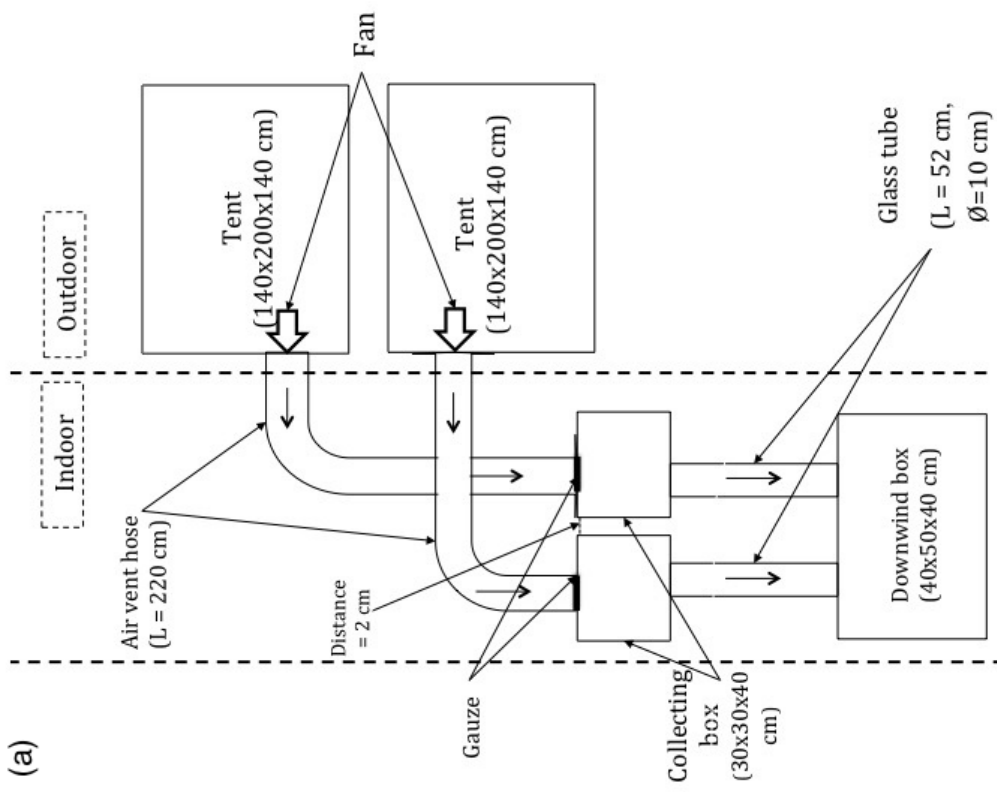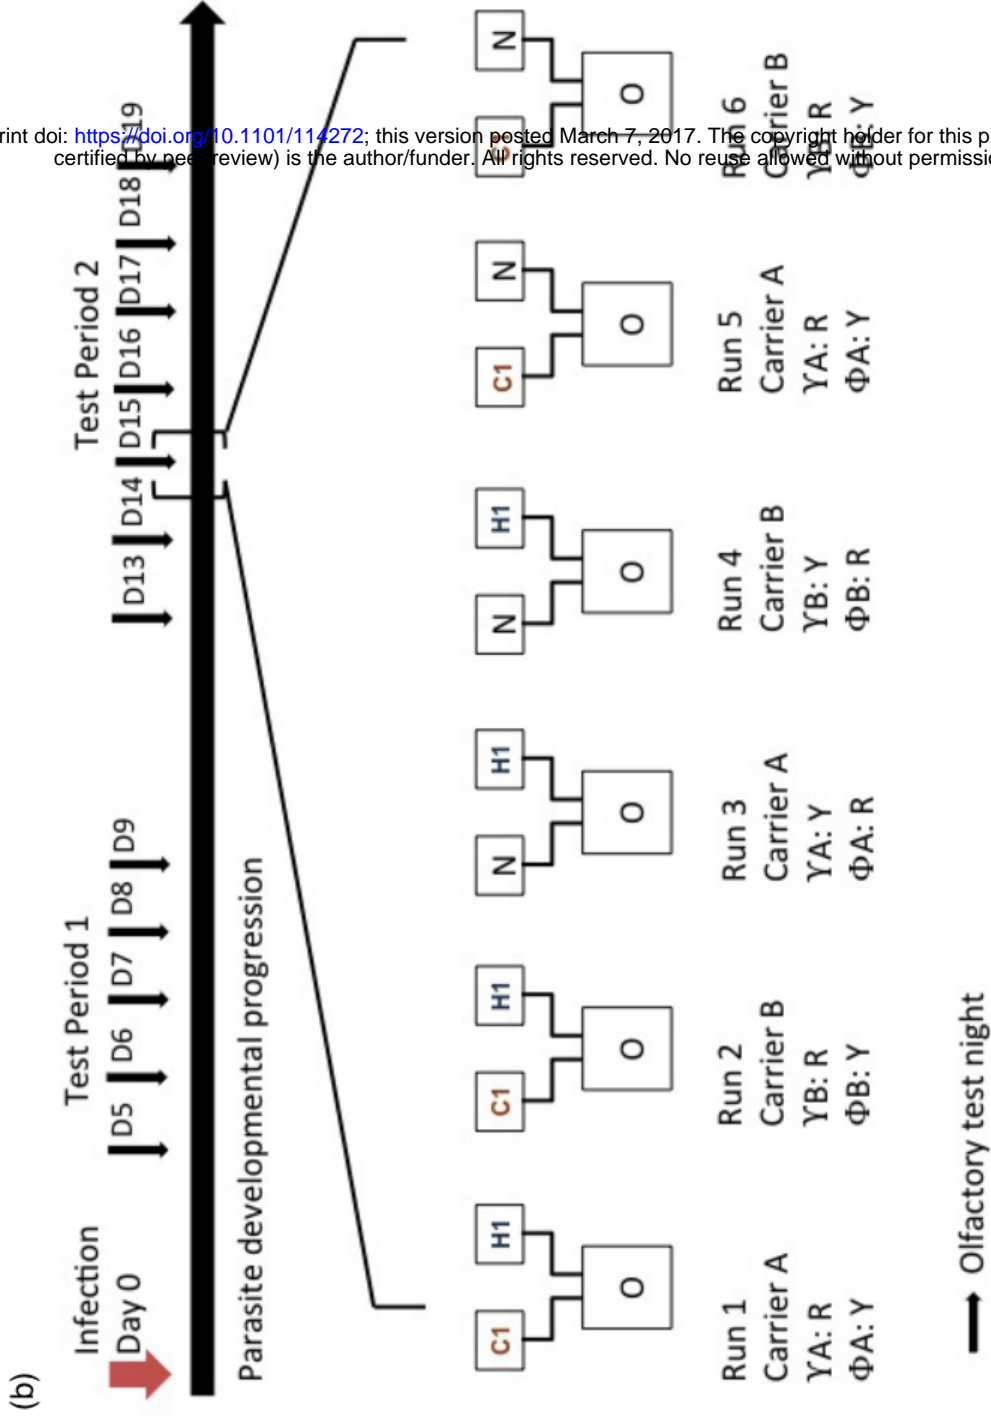

■ uninfected control ■ infected

bioRxiv preprint doi: <https://doi.org/10.1101/114272>; this version posted March 7, 2017. The copyright holder for this preprint (which was not certified by peer review) is the author/funder. All rights reserved. No reuse allowed without permission.

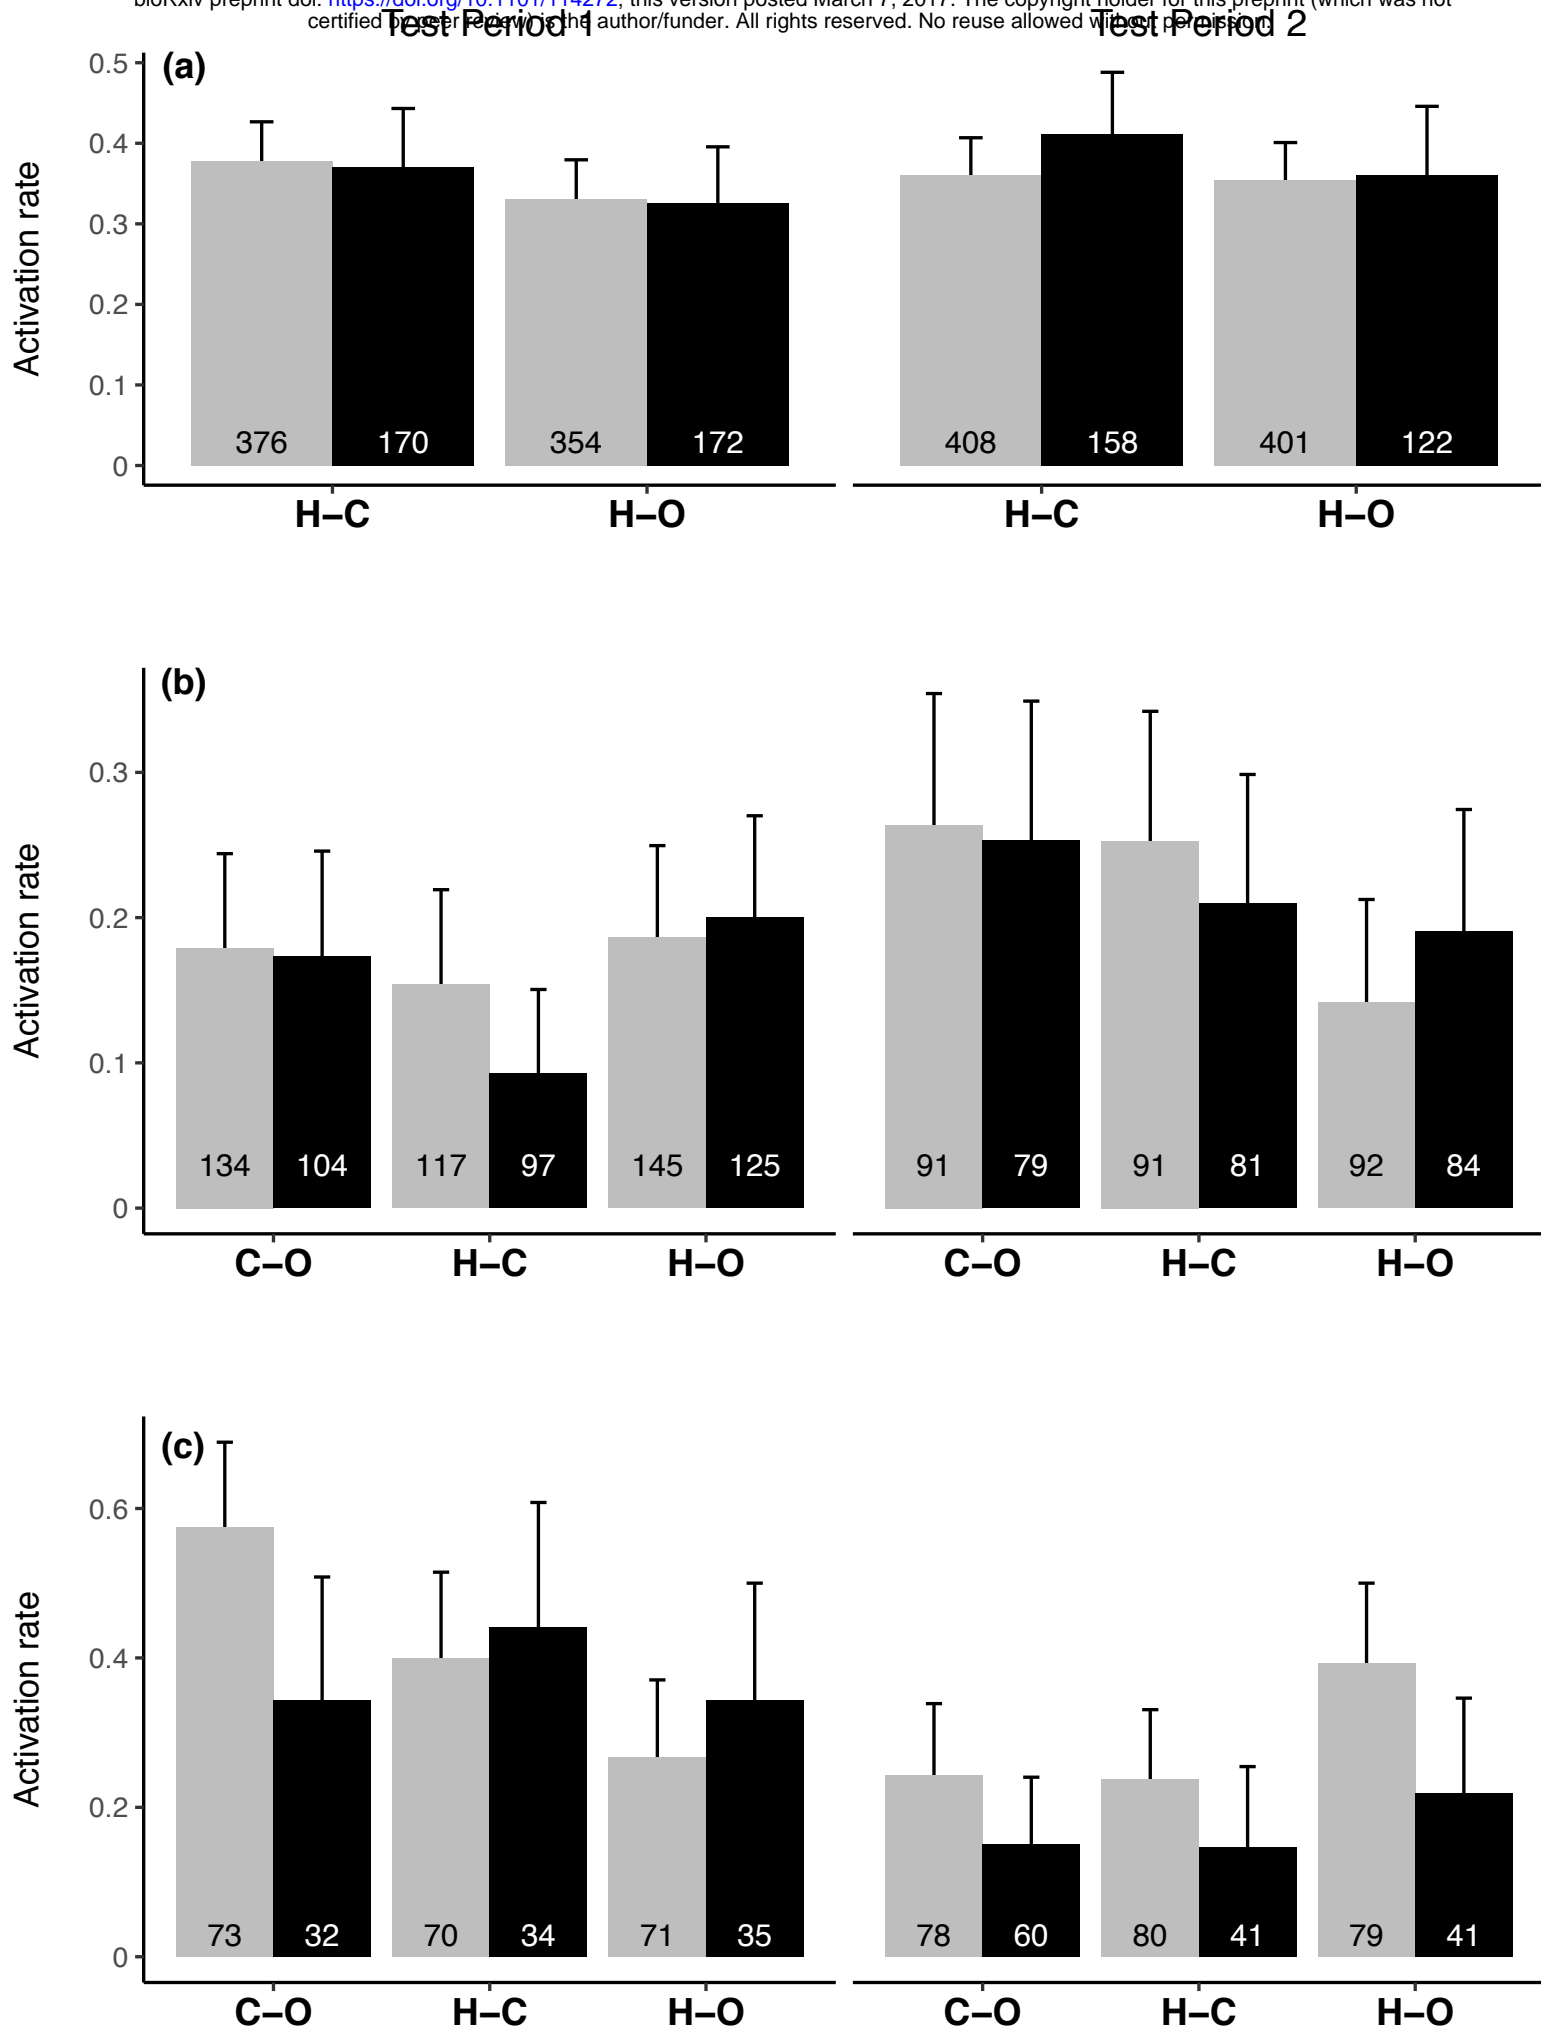

a)

uninfected control infected

bioRxiv preprint doi: <https://doi.org/10.1101/114272>; this version posted March 7, 2017. The copyright holder for this preprint (which was not certified by peer review) is the author/funder. All rights reserved. No reuse allowed without permission.

Test Period 1

Test Period 2

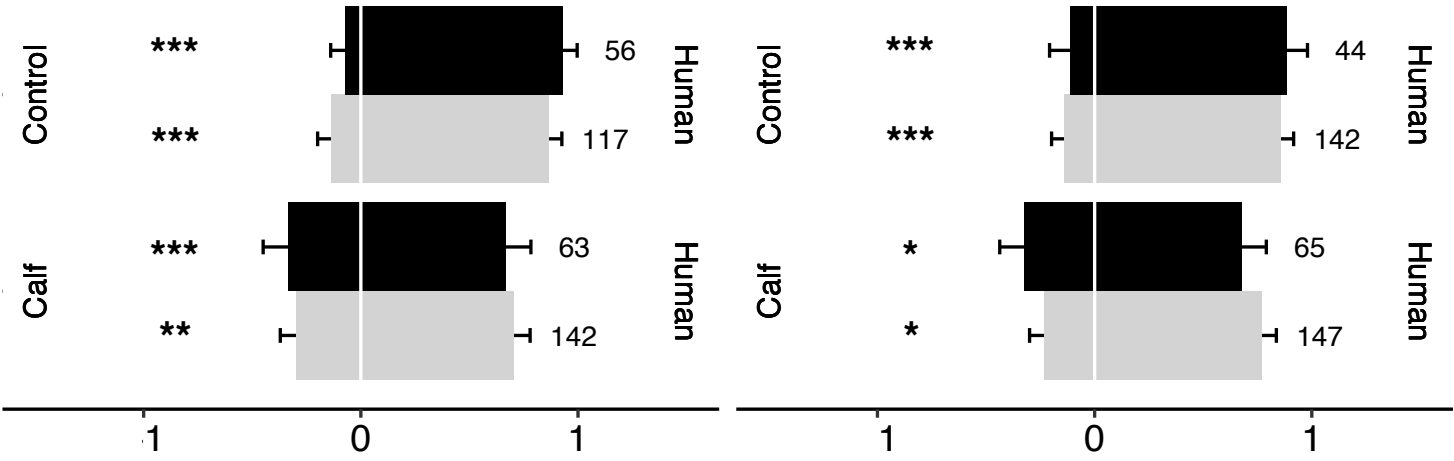

b)

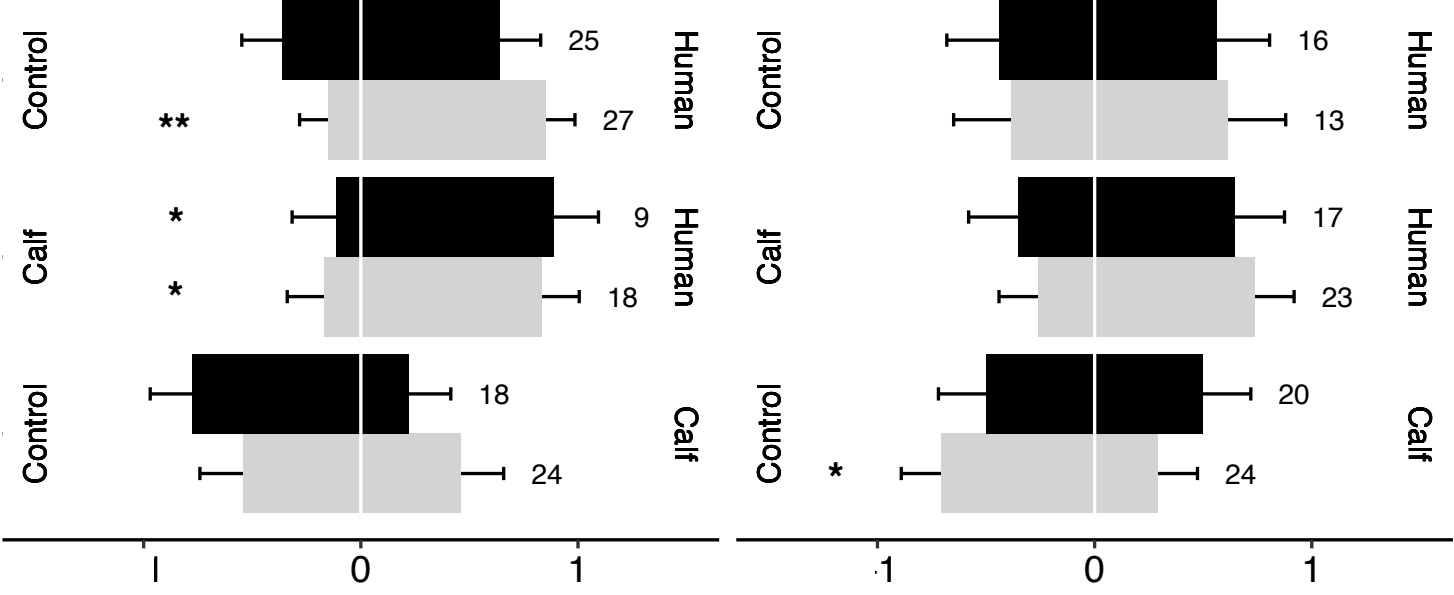

c)

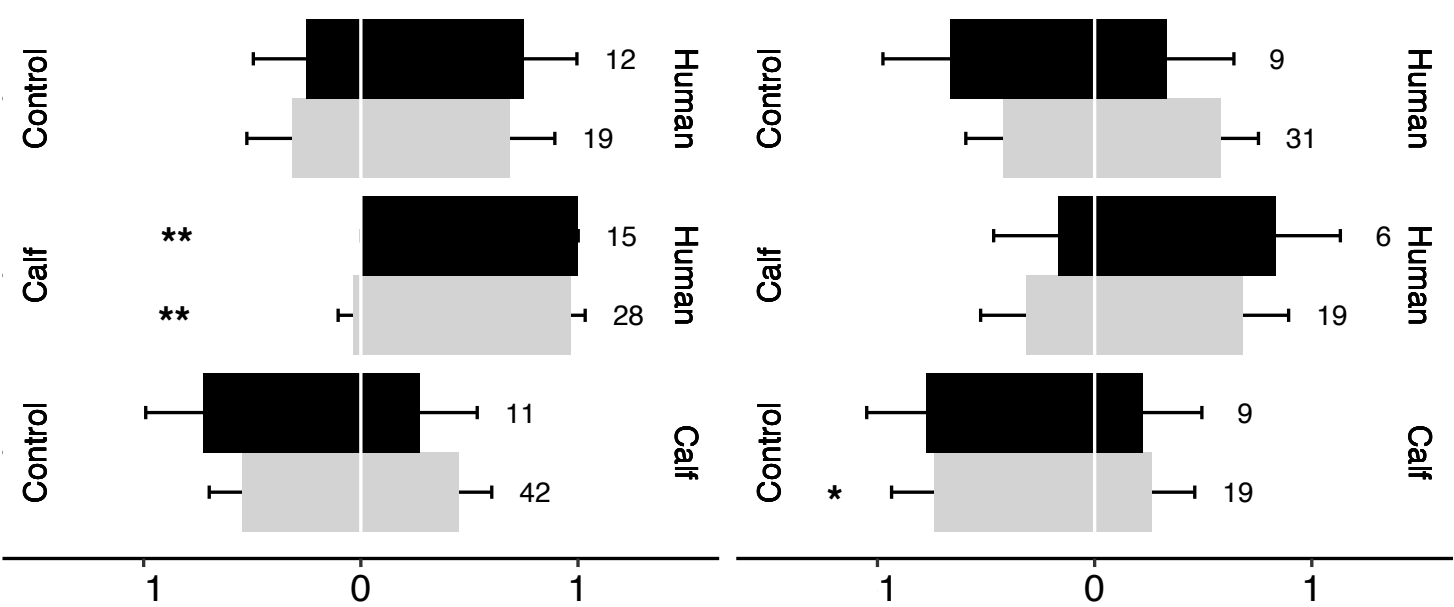

Source: https://www.biorxiv.org/content/10.1101/114272v1.full.pdf
